# Supplementary material for: Intracellular Growth and Cell Cycle Progression are Dependent on (p)ppGpp Synthetase/Hydrolase in Brucella abortus
Source: MDPI journal article supplement (doi:10.3390/pathogens9070571), 2020-07-14
Supplement: s1 [file s1]

## Supplementary data

### Content

Figure S1. Effect of *dksA* deletion on macrophage infection.

Figure S2. Codon-adapted *mesh1b* sequence

Figure S3. Fluorescence microscopy of the *pSRK-relA' mCherry-parB* strain induced with IPTG.

Table S1. Number of bacteria counted in Figure 5.

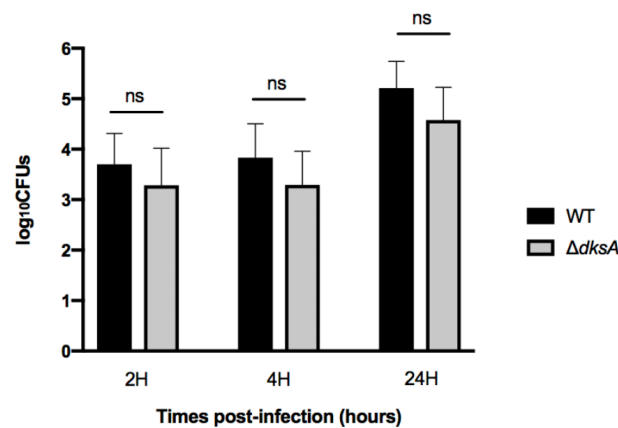

**Figure S1.** Survival of *B. abortus* WT and  $\Delta dksA$  strains during infection of RAW 264.7 macrophages. Strains were grown in liquid culture overnight in order to reach exponential phase. Cultures were then diluted in DMEM to obtain a MOI of 50. Concentrations of live bacteria ( $\log_{10}\text{CFUs ml}^{-1}$ ) were determined at 0 h, 4 h, and 24 h post-infection by plating serial dilutions. Values represent the means of three independent experiments and the error bars represent the standard deviation. A student t test was performed as statistical analysis. The asterisks mean significant for  $P < 0.05$  (\*);  $P < 0.01$  (\*\*);  $P < 0.0001$  (\*\*\*\*).

```
cccccgggatggccacctatccgtcgccaagtcatggaatgcctgcagtatccgccttcaagcatgccagcagcgccgcaag
gatccgcaggaaacccgtatgtgaatcatgtgatcaatgtgtcgaccatcctgtcggtggaagcctgcatcaccgatgaaggcgtg
ctgatggccgccctgctgcatgatgtggtggaagataccgatgcctcgttgaagatgtggaaaagctgttcggcccgatgtgtgcg
gcctggtgcgcgaaagtgaccgatgataagtcgctggaaaagcaggaacgcaagcgctgcagatcgaaaatgccccaagtgcgc
gtgccgcgcaagctgatcaagctggccgataagctggataatctgcgcgatctgcaggtgaatacccgaccggctggaccagg
aacgccgcgatcagtatttcgtgtgggccaagaaggtggtggataatctgcgcggcaccaatgccaatctggaactgaagctggat
gaaatcttccgcagcgcggcctgctgtgaaagcttggg
```

**Figure S2.** Codon-adapted sequence of Mesh1b used in this study.

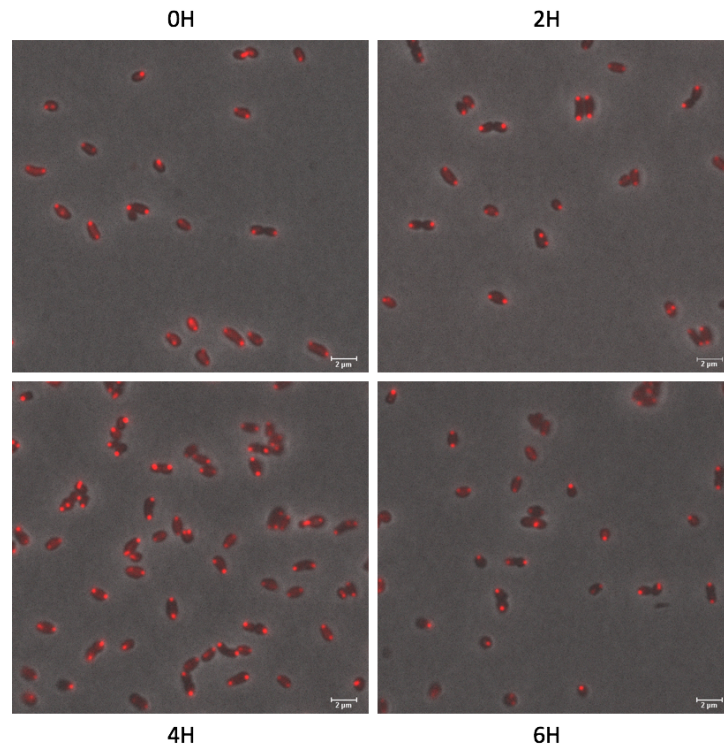

**Figure S3.** Fluorescence microscopy of the *pSRK-relA' mCherry-parB* strain induced with IPTG. Bacteria were grown in liquid culture (2YT medium) overnight in order to reach exponential phase. Culture was then diluted to an OD of 0.1 in 2YT medium supplemented with IPTG. Samples were taken every 2 hours, placed on a PBS agarose pad and observed with a fluorescence microscope. Bacteria in G1 phase (presenting only one focus of mCherry-ParB in red) were counted for each time post-induction. Scale bars represent 2  $\mu$ m.

| Time | pSRK- <i>relA'</i> | pSRK- <i>relA'</i> +IPTG | pSRK- <i>relA'</i> * | pSRK- <i>relA'</i> * +IPTG |
|------|--------------------|--------------------------|----------------------|----------------------------|
| 0 h  | 262                | 262                      | 289                  | 289                        |
|      | 341                | 341                      | 356                  | 356                        |
|      | 291                | 291                      | 307                  | 291                        |
| 2 h  | 260                | 286                      | 268                  | 260                        |
|      | 283                | 300                      | 321                  | 297                        |
|      | 302                | 317                      | 287                  | 285                        |
| 4 h  | 243                | 275                      | 246                  | 236                        |
|      | 312                | 393                      | 291                  | 295                        |
|      | 282                | 411                      | 317                  | 344                        |
| 6 h  | 285                | 326                      | 252                  | 257                        |
|      | 317                | 355                      | 296                  | 288                        |
|      | 327                | 431                      | 311                  | 341                        |

**Table S1.** Number of bacteria considered (n) in the G1 counting experiment (Figure 5) for each strain with or without IPTG and at each time post-induction.
